# Supplementary material for: Mechanisms Underlying the Antinociceptive, Antiedematogenic, and Anti‐Inflammatory Activity of the Main Flavonoid fromKalanchoe pinnata
Source: Hindawi journal article supplement (doi:10.1155/2014/429256), 2014-01-01
Supplement: f1 [file 429256.f1.pdf]

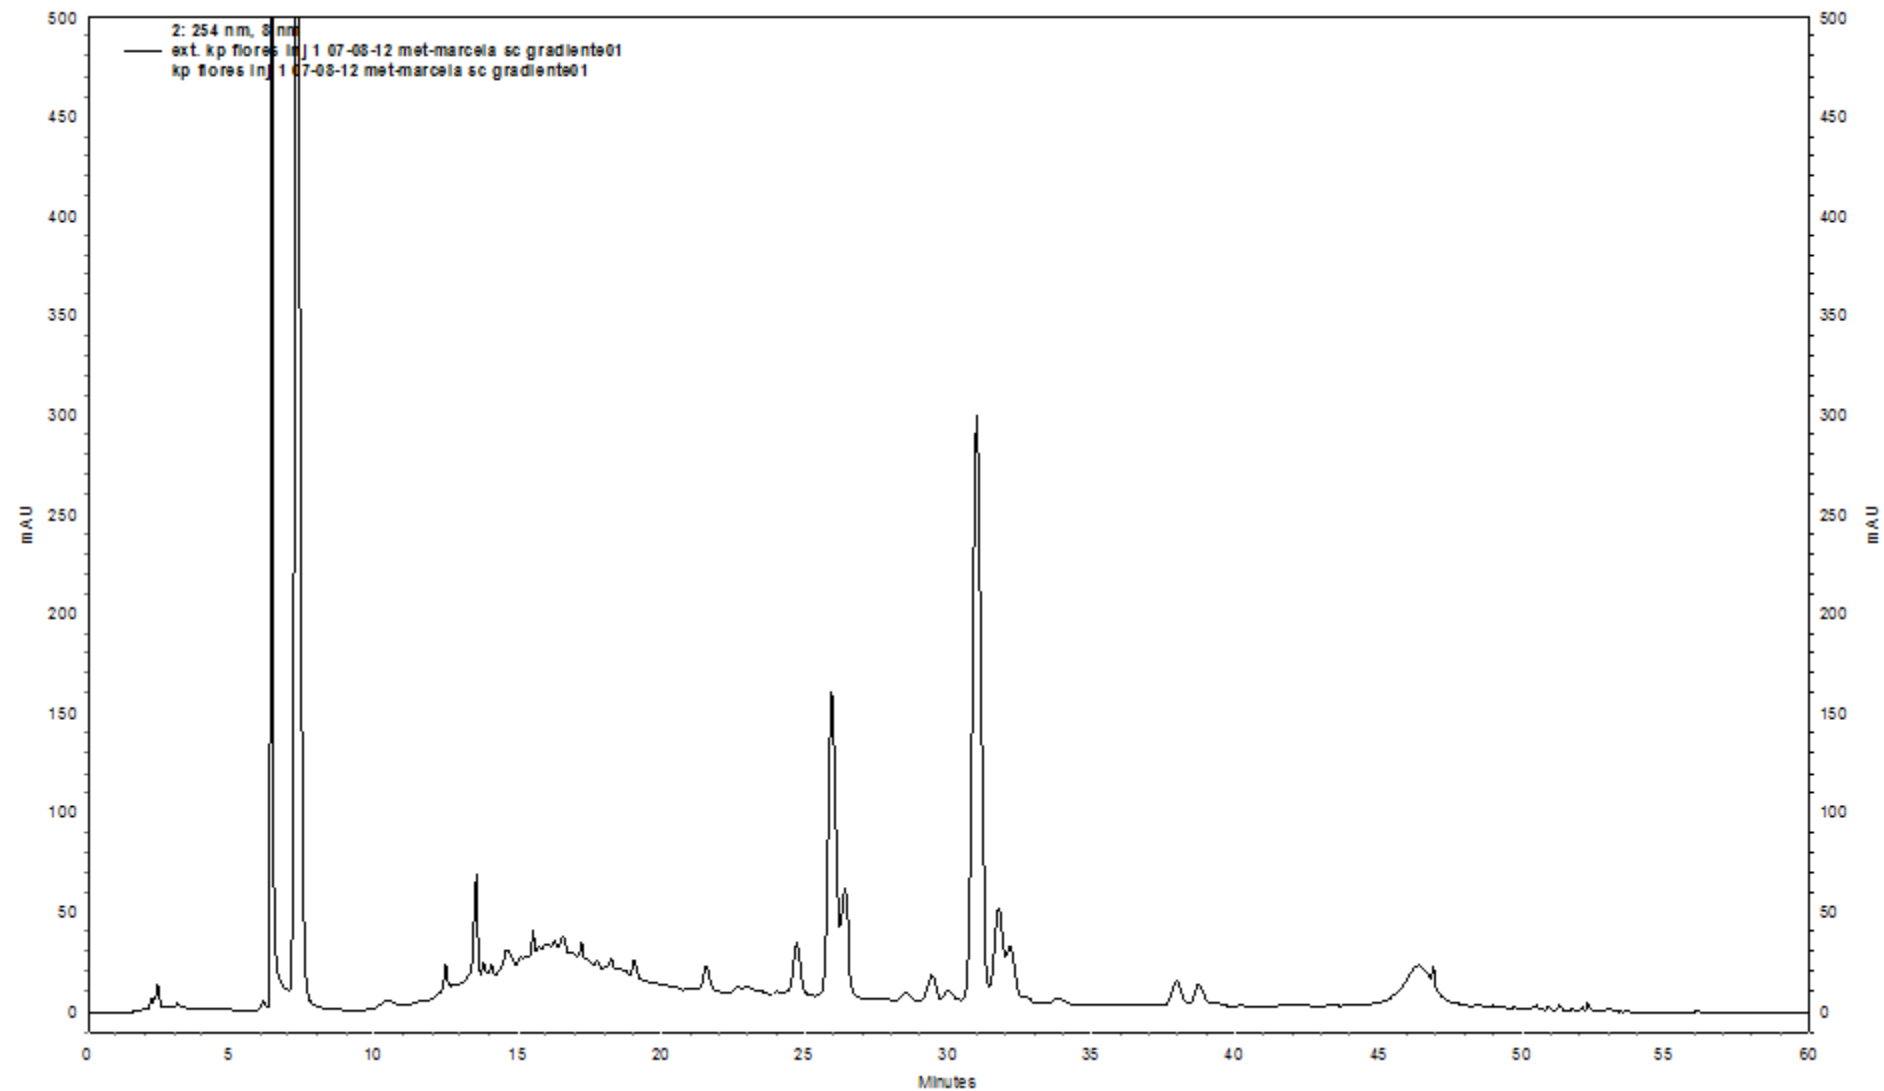

**Fig. 1** HPLC chromatogram (254 nm) of aqueous extract from *Kalanchoe pinnata* flowers (sample: 10 mg/ml, volume injected: 20  $\mu$ l, RP-18, H<sub>2</sub>O- CH<sub>3</sub>CN gradient).

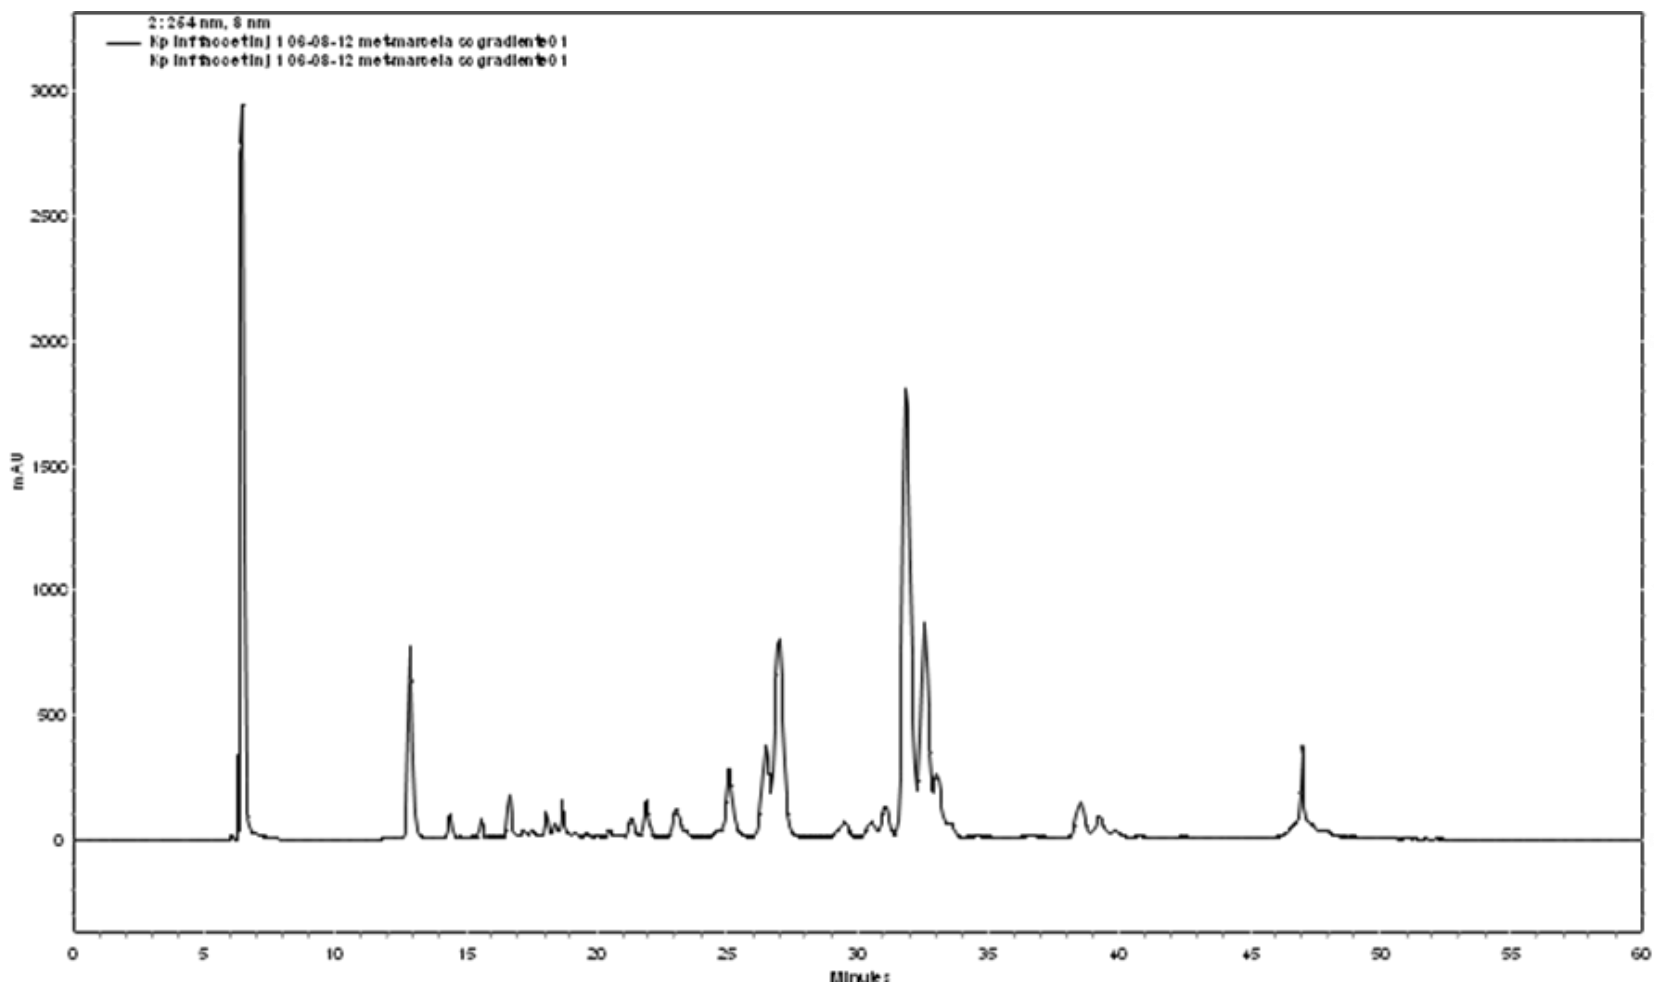

**Fig. 2** HPLC chromatogram (254 nm) of ethyl acetate fraction (EtOAcF) from *Kalanchoe pinnata* flowers aqueous extract (sample: 10 mg/ml, volume injected: 20  $\mu$ l, RP-18, H<sub>2</sub>O- CH<sub>3</sub>CN gradient).

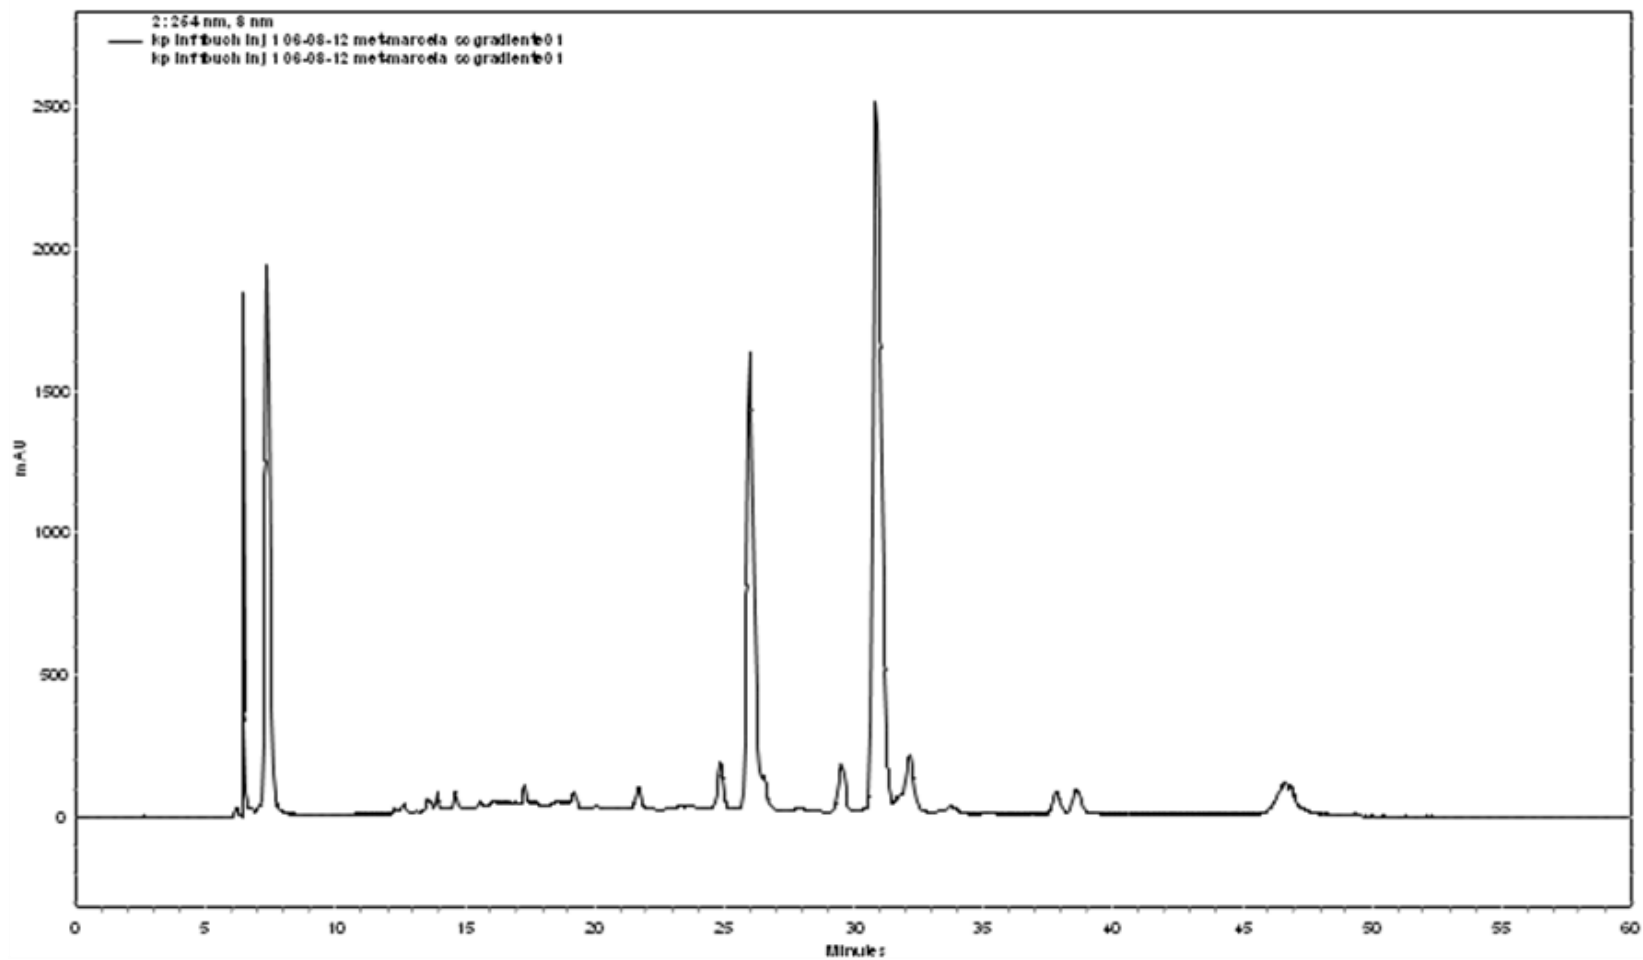

**Fig. 3** HPLC chromatogram (254 nm) of butanolic fraction (BuOHF) from *Kalanchoe pinnata* flowers aqueous extract (sample: 10 mg/ml, volume injected: 20 µl, RP-18, H<sub>2</sub>O- CH<sub>3</sub>CN gradient).

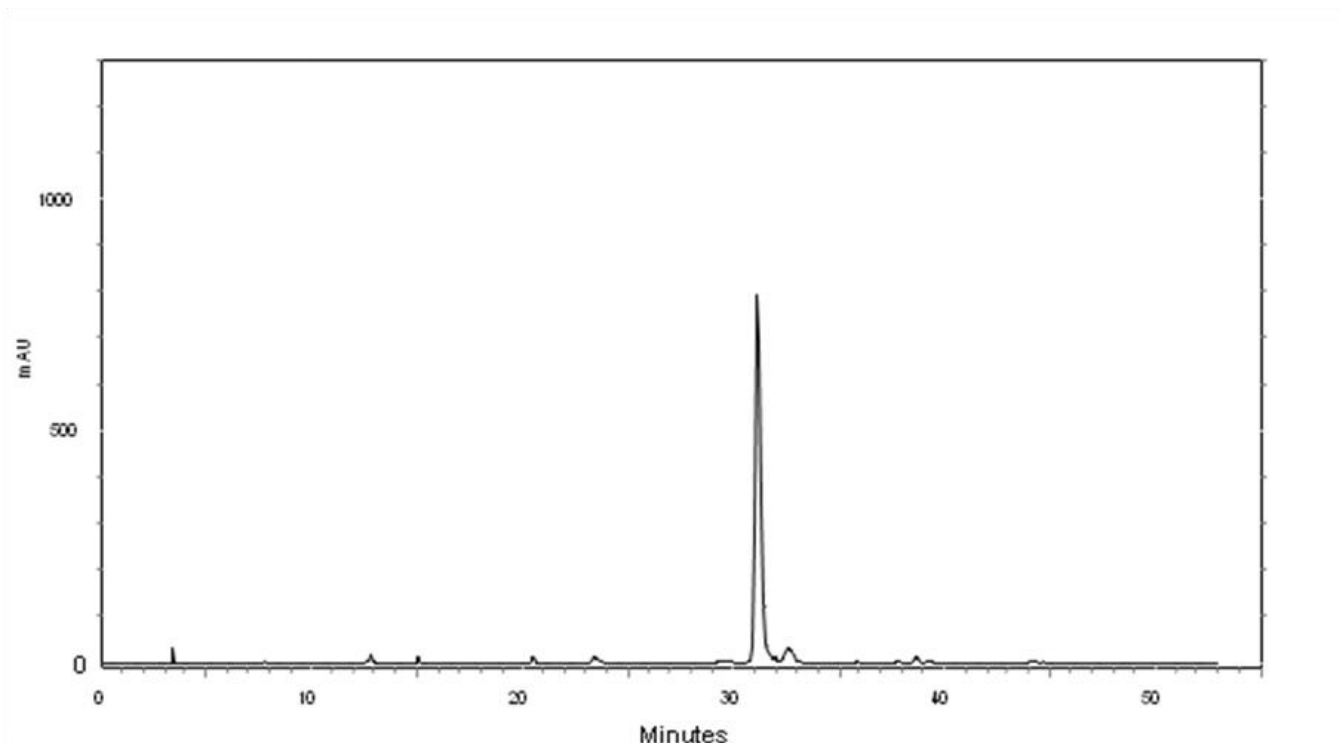

**Fig. 4** HPLC chromatogram (254 nm) of the isolated flavonoid [quercetin 3-*O*- $\alpha$ -L-arabinopyranosyl (1 $\rightarrow$ 2)  $\alpha$ -L-rhamnopyranoside] (KPFV) (Retention time: 31.2 minutes, sample: 1.0 mg/ml, volume injected: 20  $\mu$ l, RP-18, H<sub>2</sub>O- CH<sub>3</sub>CN gradient).

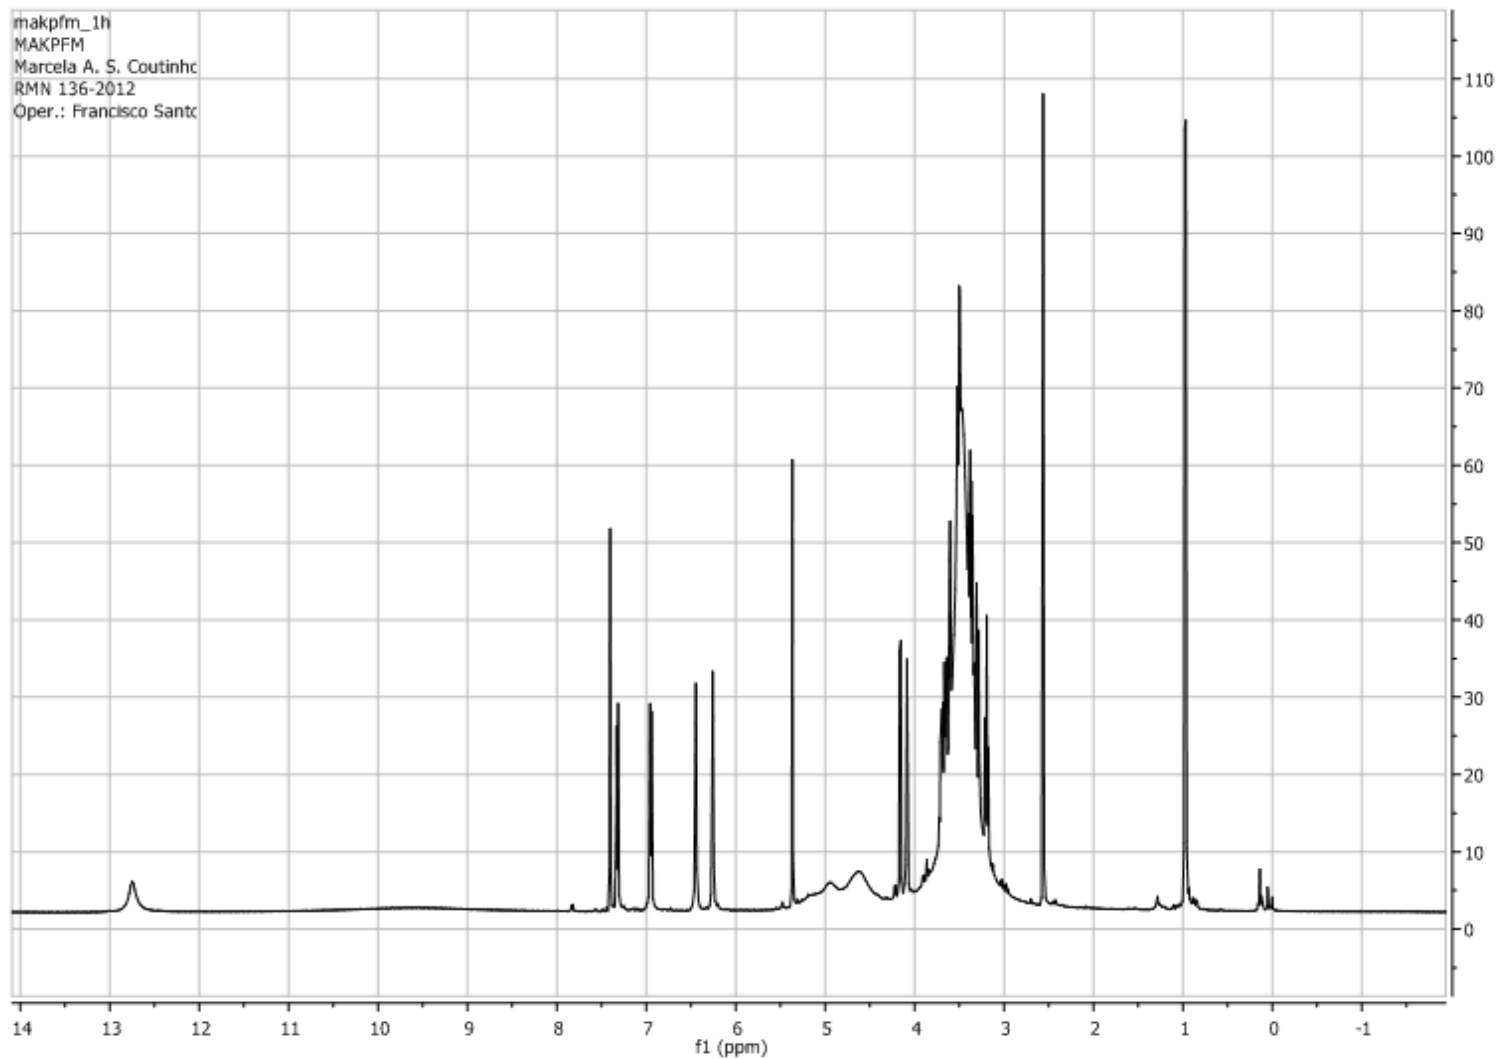

**Fig. 5** <sup>1</sup>H NMR spectra (500 MHz; DMSO-*d*<sub>6</sub>) of the isolated flavonoid [quercetin 3-*O*- $\alpha$ -L-arabinopyranosyl (1 $\rightarrow$ 2)  $\alpha$ -L-rhamnopyranoside] (KPFV). Parameters: NS 16, SWH 8012 Hz, TD 32768, TMS, 25°C.

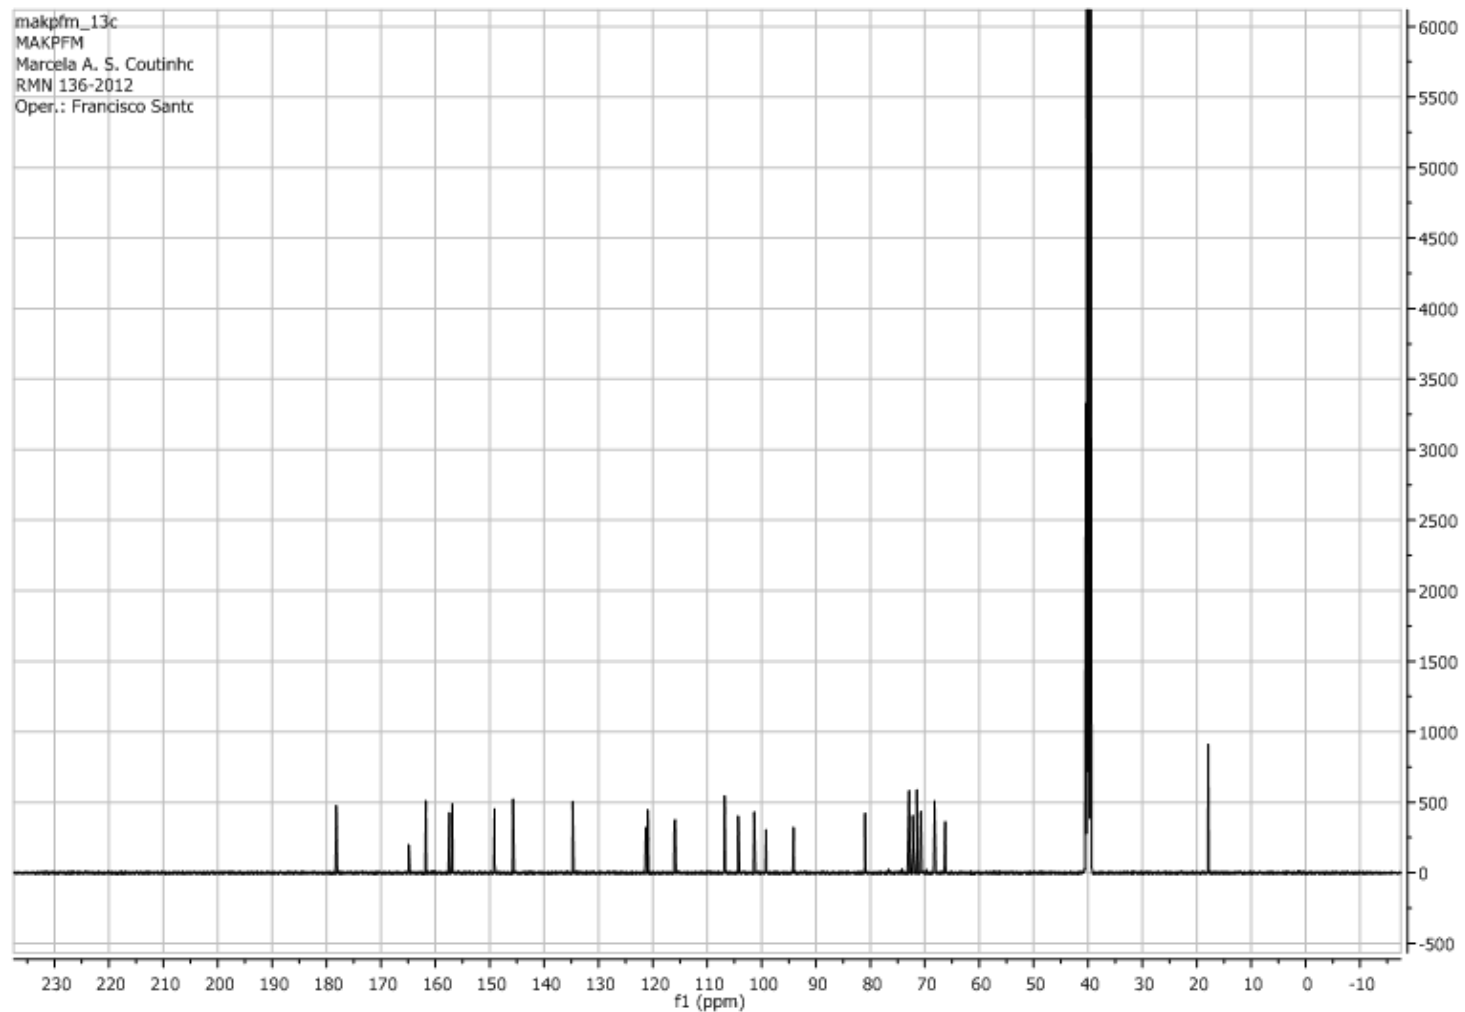

**Fig. 6**  $^{13}\text{C}$  NMR spectra (125 MHz;  $\text{DMSO}-d_6$ ) of the isolated flavonoid [quercetin 3-*O*- $\alpha$ -L-arabinopyranosyl (1 $\rightarrow$ 2)  $\alpha$ -L-rhamnopyranoside] (KPFV). Parameters: NS 98432, SWH 32051 Hz, TD 65536, TMS, 25°C.
